# Supplementary material for: pH and Reduction Dual-Responsive Nanogels as Smart Nanocarriers to Resist Doxorubicin Aggregation
Source: MDPI journal article supplement (doi:10.3390/molecules27185983), 2022-09-14
Supplement: s1 [file s1]

# Supplementary Information

## DLS measurements of nanogels

|                                | Size (d.nm):         | % Intensity: | St Dev (d.nm): |
|--------------------------------|----------------------|--------------|----------------|
| <b>Z-Average (d.nm):</b> 87.67 | <b>Peak 1:</b> 117.8 | 91.6         | 63.37          |
| <b>Pdl:</b> 0.307              | <b>Peak 2:</b> 20.87 | 5.5          | 4.801          |
| <b>Intercept:</b> 0.965        | <b>Peak 3:</b> 4238  | 2.9          | 1293           |
| <b>Result quality :</b> Good   |                      |              |                |

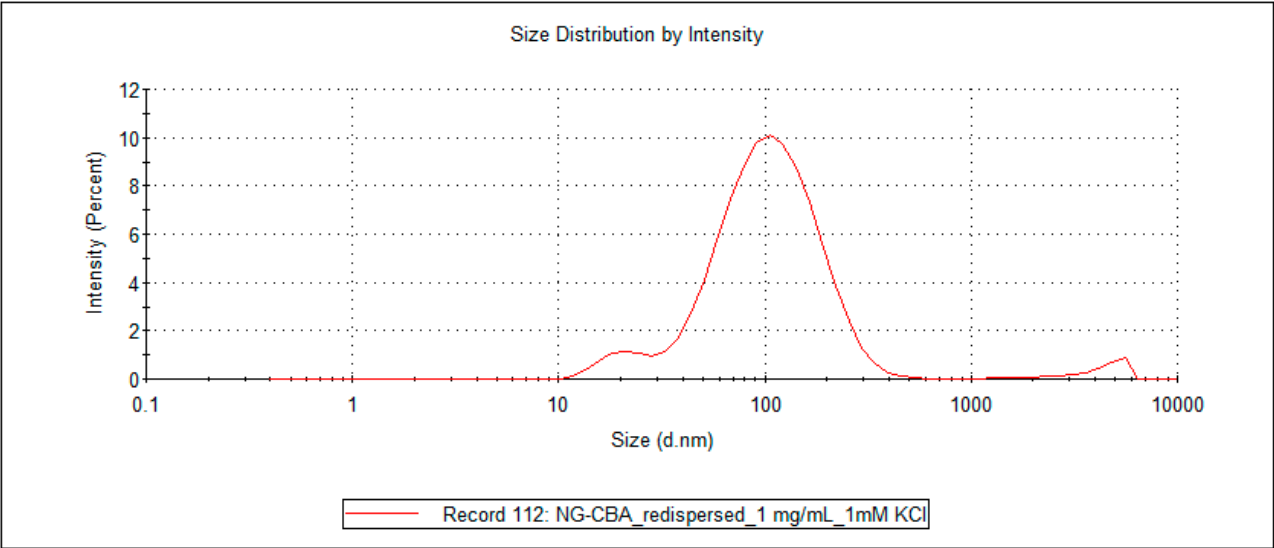

Figure S1. Average size distribution ( $d_H$ ) of NG-CBA, ( $n = 4$ ).

|                                | Size (d.nm):         | % Intensity: | St Dev (d.nm): |
|--------------------------------|----------------------|--------------|----------------|
| <b>Z-Average (d.nm):</b> 91.19 | <b>Peak 1:</b> 142.3 | 83.8         | 73.17          |
| <b>Pdl:</b> 0.380              | <b>Peak 2:</b> 33.37 | 14.8         | 7.334          |
| <b>Intercept:</b> 0.968        | <b>Peak 3:</b> 5078  | 1.4          | 563.0          |
| <b>Result quality :</b> Good   |                      |              |                |

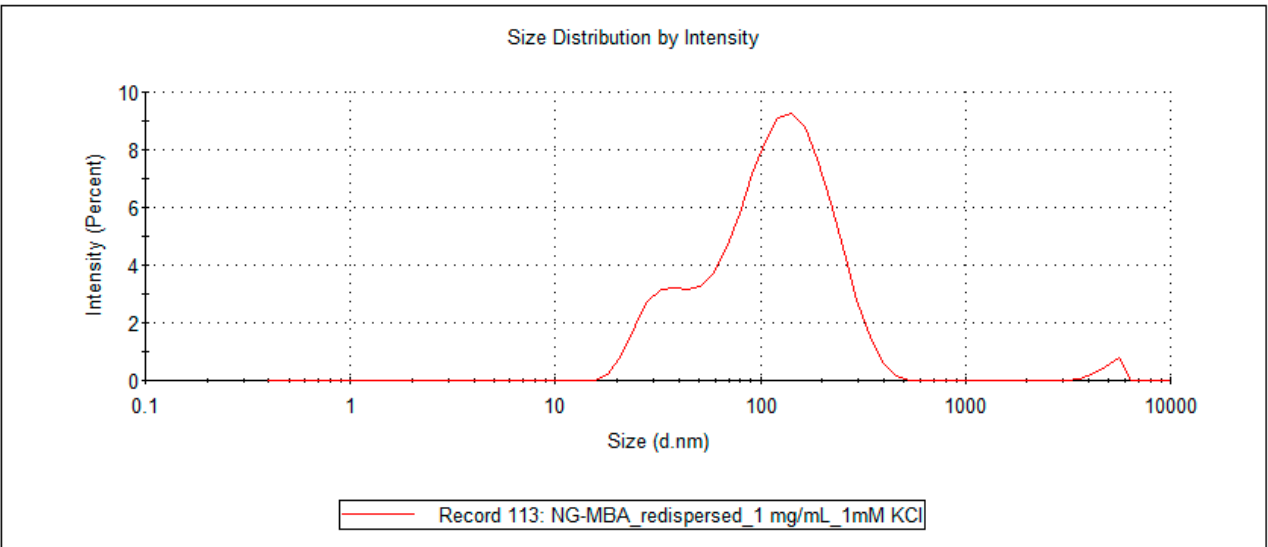

Figure S2. Average size distribution ( $d_H$ ) of NG-MBA, ( $n = 4$ ).

**Zeta potential measurements of nanogels**

|                                    | Mean (mV)            | Area (%) | St Dev (mV) |
|------------------------------------|----------------------|----------|-------------|
| <b>Zeta Potential (mV):</b> -23.6  | <b>Peak 1:</b> -23.5 | 100.0    | 5.70        |
| <b>Zeta Deviation (mV):</b> 5.40   | <b>Peak 2:</b> 0.00  | 0.0      | 0.00        |
| <b>Conductivity (mS/cm):</b> 0.203 | <b>Peak 3:</b> 0.00  | 0.0      | 0.00        |
| <b>Result quality :</b> Good       |                      |          |             |

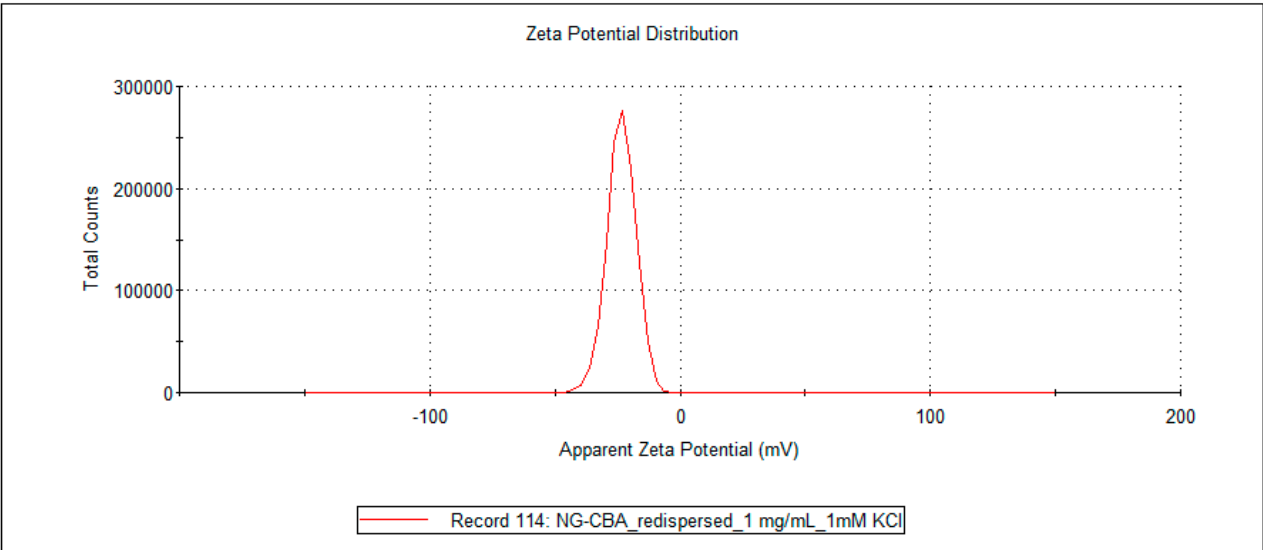

**Figure S3.** Average zeta potential of NG-CBA, ( $n = 4$ ).

|                                    | Mean (mV)            | Area (%) | St Dev (mV) |
|------------------------------------|----------------------|----------|-------------|
| <b>Zeta Potential (mV):</b> -20.4  | <b>Peak 1:</b> -20.3 | 100.0    | 5.40        |
| <b>Zeta Deviation (mV):</b> 5.35   | <b>Peak 2:</b> 0.00  | 0.0      | 0.00        |
| <b>Conductivity (mS/cm):</b> 0.182 | <b>Peak 3:</b> 0.00  | 0.0      | 0.00        |
| <b>Result quality :</b> Good       |                      |          |             |

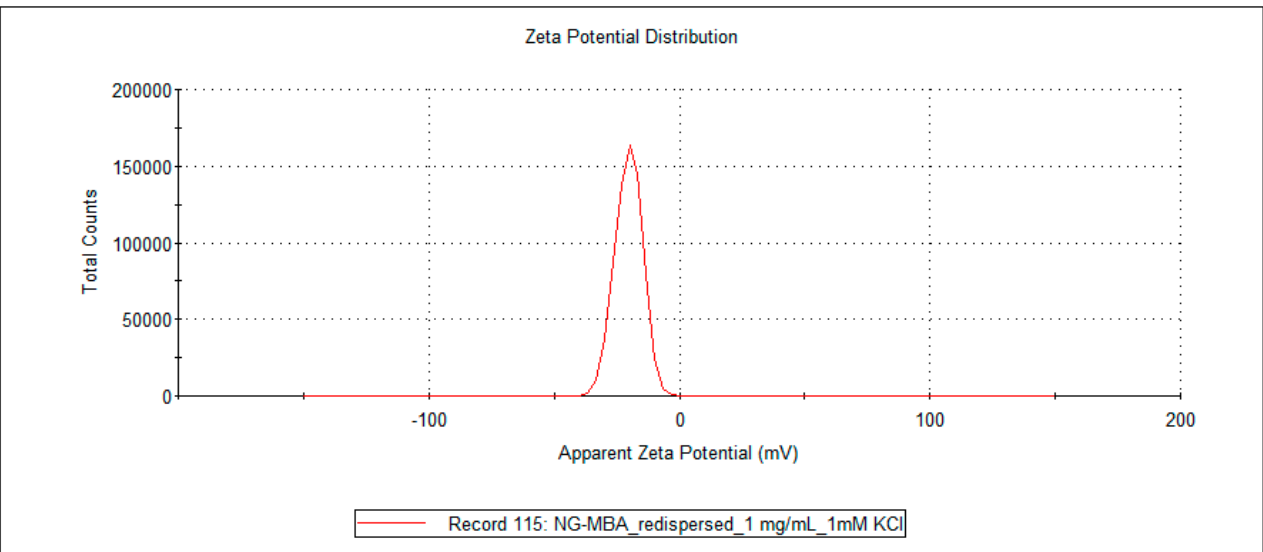

**Figure S4.** Average zeta potential of NG-MBA, ( $n = 4$ ).

|                                    | Mean (mV)            | Area (%) | St Dev (mV) |
|------------------------------------|----------------------|----------|-------------|
| <b>Zeta Potential (mV):</b> -6.33  | <b>Peak 1:</b> -6.19 | 100.0    | 5.82        |
| <b>Zeta Deviation (mV):</b> 5.42   | <b>Peak 2:</b> 0.00  | 0.0      | 0.00        |
| <b>Conductivity (mS/cm):</b> 0.163 | <b>Peak 3:</b> 0.00  | 0.0      | 0.00        |
| <b>Result quality :</b> Good       |                      |          |             |

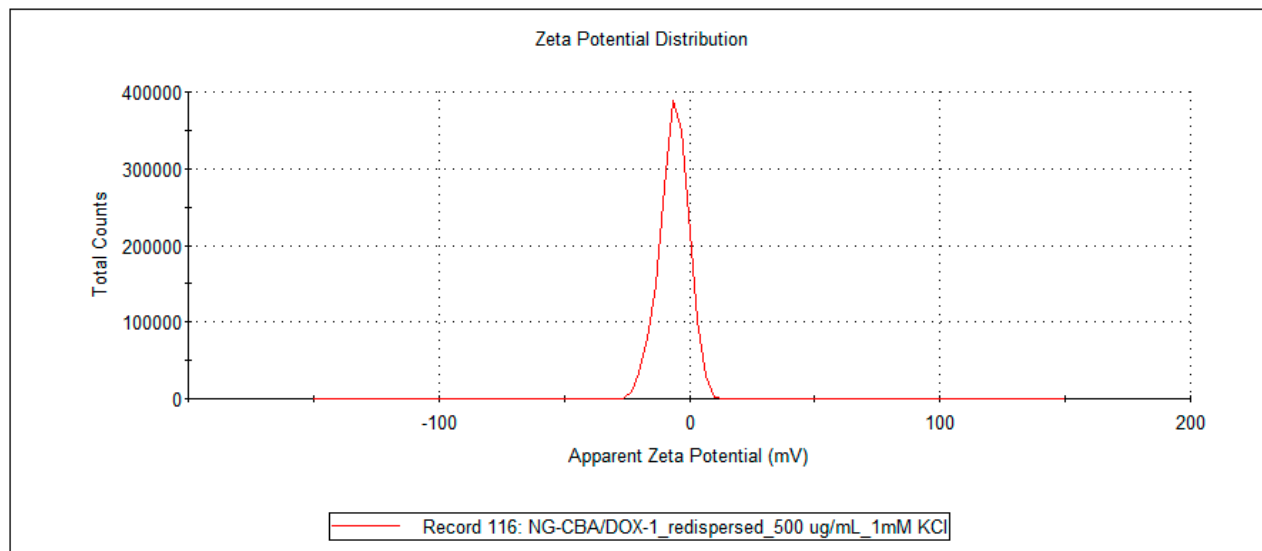

**Figure S5.** Average zeta potential of NG-CBA/DOX-1, ( $n = 4$ ).

|                                    | Mean (mV)            | Area (%) | St Dev (mV) |
|------------------------------------|----------------------|----------|-------------|
| <b>Zeta Potential (mV):</b> -8.92  | <b>Peak 1:</b> -9.03 | 100.0    | 6.26        |
| <b>Zeta Deviation (mV):</b> 5.98   | <b>Peak 2:</b> 0.00  | 0.0      | 0.00        |
| <b>Conductivity (mS/cm):</b> 0.171 | <b>Peak 3:</b> 0.00  | 0.0      | 0.00        |
| <b>Result quality :</b> Good       |                      |          |             |

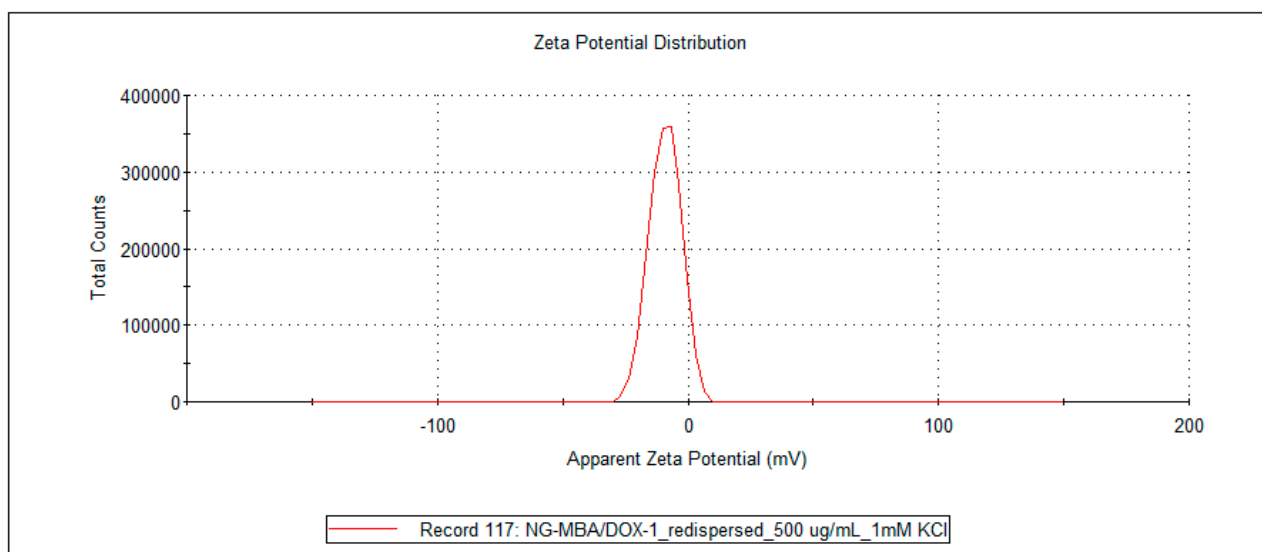

**Figure S6.** Average zeta potential of NG-MBA/DOX-1, ( $n = 4$ ).

|                                    | Mean (mV)            | Area (%) | St Dev (mV) |
|------------------------------------|----------------------|----------|-------------|
| <b>Zeta Potential (mV): -18.6</b>  | <b>Peak 1: -18.5</b> | 99.9     | 5.06        |
| <b>Zeta Deviation (mV): 5.16</b>   | <b>Peak 2: 6.46</b>  | 0.1      | 0.00        |
| <b>Conductivity (mS/cm): 0.218</b> | <b>Peak 3: 0.00</b>  | 0.0      | 0.00        |
| <b>Result quality : Good</b>       |                      |          |             |

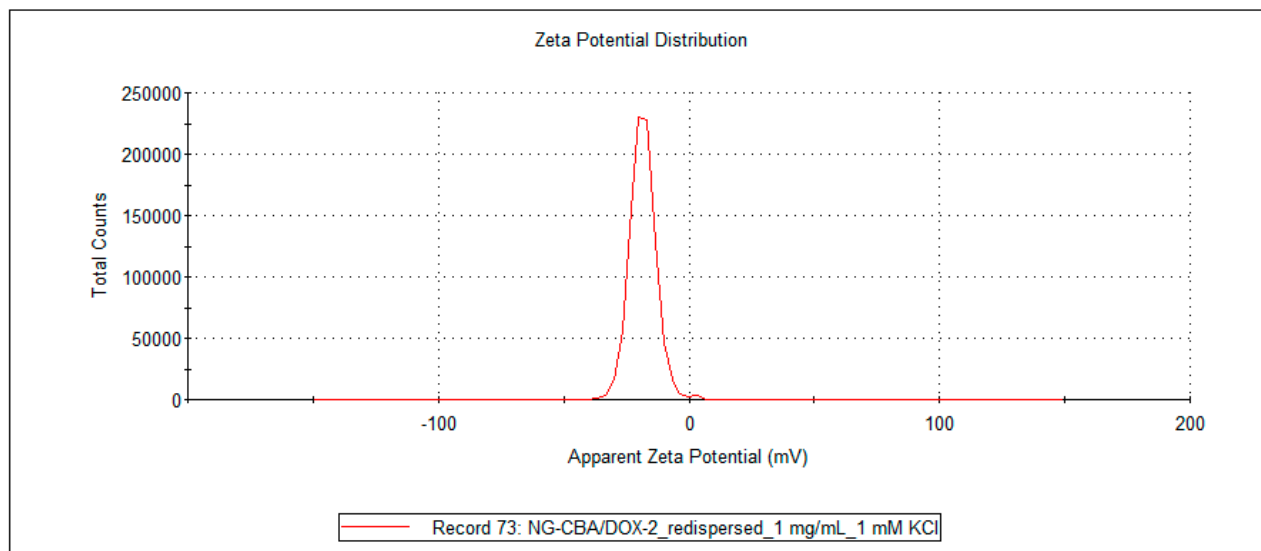

**Figure S7.** Average zeta potential of NG-CBA/DOX-2, ( $n = 4$ ).

|                                     | Mean (mV)            | Area (%) | St Dev (mV) |
|-------------------------------------|----------------------|----------|-------------|
| <b>Zeta Potential (mV): -11.3</b>   | <b>Peak 1: -10.7</b> | 100.0    | 2.99        |
| <b>Zeta Deviation (mV): 3.10</b>    | <b>Peak 2: 0.00</b>  | 0.0      | 0.00        |
| <b>Conductivity (mS/cm): 0.0729</b> | <b>Peak 3: 0.00</b>  | 0.0      | 0.00        |
| <b>Result quality : Good</b>        |                      |          |             |

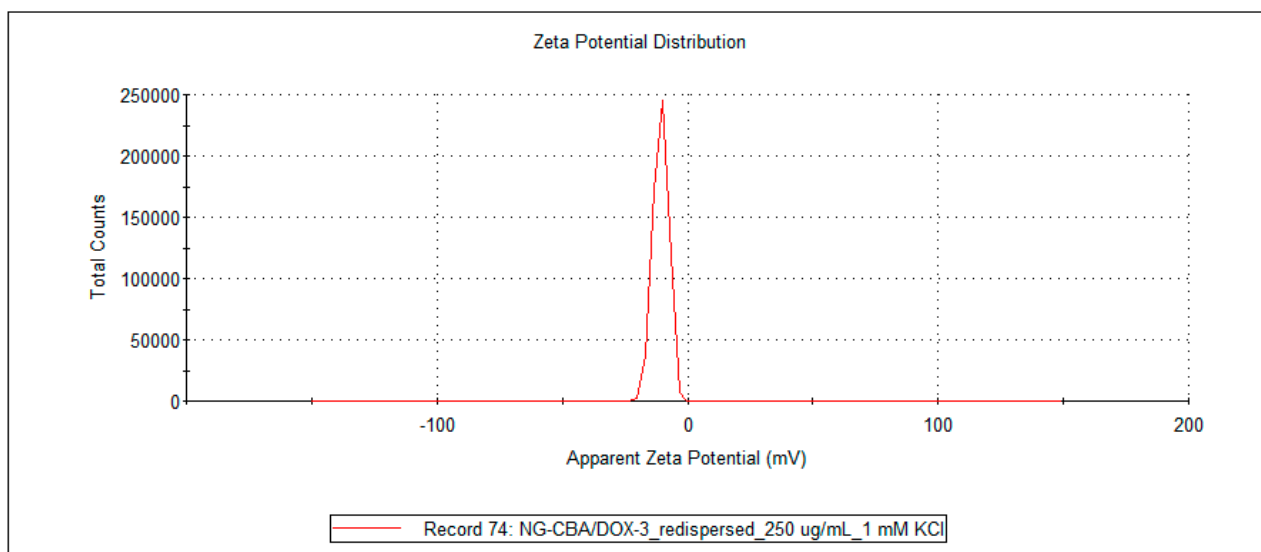

**Figure S8.** Average zeta potential of NG-CBA/DOX-3, ( $n = 4$ ).
